# Supplementary material for: Different HCV Exposure Drives Specific miRNA Profile in PBMCs of HIV Patients
Source: MDPI journal article supplement (doi:10.3390/biomedicines9111627), 2021-11-05
Supplement: s1 [file s1]

# 1. Supplementary Materials and Methods

## 1.1 Patients

Exclusion criteria: pregnancy, individuals below 18 years old, previous HCV treatment, advanced liver fibrosis (>F3), clinical evidence of hepatic decompensation, active drug or alcohol addiction, alcohol-induced liver injury, HBV active infection, opportunistic infections, and other concomitant diseases such as diabetes, nephropathies, autoimmune disease, hemochromatosis, cryoglobulinemia, primary biliary cirrhosis, Wilson's disease,  $\alpha$ 1-antitrypsin deficiency, and neoplasia.

Clinical records: Clinical and epidemiological data were obtained from medical records: HCV-RNA viral load (IU/mL). In the case of patients with a previous history of intravenous drug use (IDU), the time of infection was estimated since the first year they shared needles and other injection paraphernalia <sup>1</sup>. The liver stiffness measurement (LSM) was assessed by transient elastometry (FibroScan®, Echosens, Paris, France) and expressed in kilopascals (kPa). Subjects were stratified according to cut-offs of LSM: <7.1 kPa (F0–F1: absence or mild fibrosis) and 7.1–9.4 kPa (F2: significant fibrosis). The clinical characteristics of metabolic status and biochemical parameter of liver function and genotype of rs12979860 polymorphism at interferon lambda 4 (gene/pseudogene) (*IFNL4*) was also recorded.

## 1.2 High throughput sequencing of small RNA

Peripheral venous blood samples were collected in EDTA tubes, and PBMCs were isolated within the first 4 hours after extraction. Total RNA including miRNAs were isolated from PBMCs with the miRNeasy Mini kit (Qiagen). Quality and integrity of the RNA were evaluated by the Bioanalyzer 2100 with Agilent RNA 6000 Nano kit (Agilent). Only those samples with a RNA integrity number (RIN) > 7.5 were sequenced.

Small RNA library synthesis and sequencing were performed at Centre for Genomic Regulation (CRG) at Barcelona (Spain), as previously described <sup>2</sup>. Small RNA libraries were constructed with Illumina's TruSeq Small RNA kit v.4 (Illumina) and sequenced in an Illumina HiSeq2500, with 1x50.

## 1.3 MicroRNA data processing: Bioinformatics analysis

The raw data were initially filtered out for reads with ambiguous base calls. Quality control of the remaining sequences was performed by using FastQC (v0.11.3) <sup>3</sup>. Adapter sequences, as well as low quality base calls ( $q < 20$ ), were trimmed with cutadapt (v. 1.18) <sup>4</sup>. Adapter trimmed reads were processed with miRDeep2 (v. 0.0.7) <sup>5</sup>. Only the alignments with 0 mismatches in the seed region and that do not map to more than five different loci in the genome were retained. miRBase v21 which contains 2888 precursors was used as reference.

## 1.4 Bibliografía

1. Thorpe, L. E.; Ouellet, L. J.; Hershow, R.; Bailey, S. L.; Williams, I. T.; Williamson, J.; Monterroso, E. R.; Garfein, R. S., Risk of hepatitis C virus infection among young adult injection drug users who share injection equipment. *Am. J. Epidemiol.* **2002**, 155 (7), 645-53.
2. Brochado-Kith, Ó.; Gómez Sanz, A.; Real, L. M.; Crespo García, J.; Ryan Murúa, P.; Macías, J.; Cabezas González, J.; Troya, J.; Pineda, J. A.; Arias Loste, M. T.; Díez Viñas, V.; Jiménez-Sousa, M.; Medrano de Dios, L. M.; Cuesta De la Plaza, I.; Monzón Fernández, S.; Resino García, S.; Fernández-Rodríguez, A., MicroRNA Profile of HCV Spontaneous Clarified Individuals, Denotes Previous HCV Infection. *J Clin Med* **2019**, 8 (6).
3. S., A. FastQC: a quality control tool for high throughput sequence data. <http://www.bioinformatics.babraham.ac.uk/projects/fastqc>.
4. Martin, M., Cutadapt removes adapter sequences from high-throughput sequencing reads. *EMBnet. journal* **2011**, 17 (1), 10-12.
5. Friedländer, M. R.; Mackowiak, S. D.; Li, N.; Chen, W.; Rajewsky, N., miRDeep2 accurately identifies known and hundreds of novel microRNA genes in seven animal clades. *Nucleic Acids Res* **2012**, 40 (1), 37-52.

## 2. Supplementary Figures

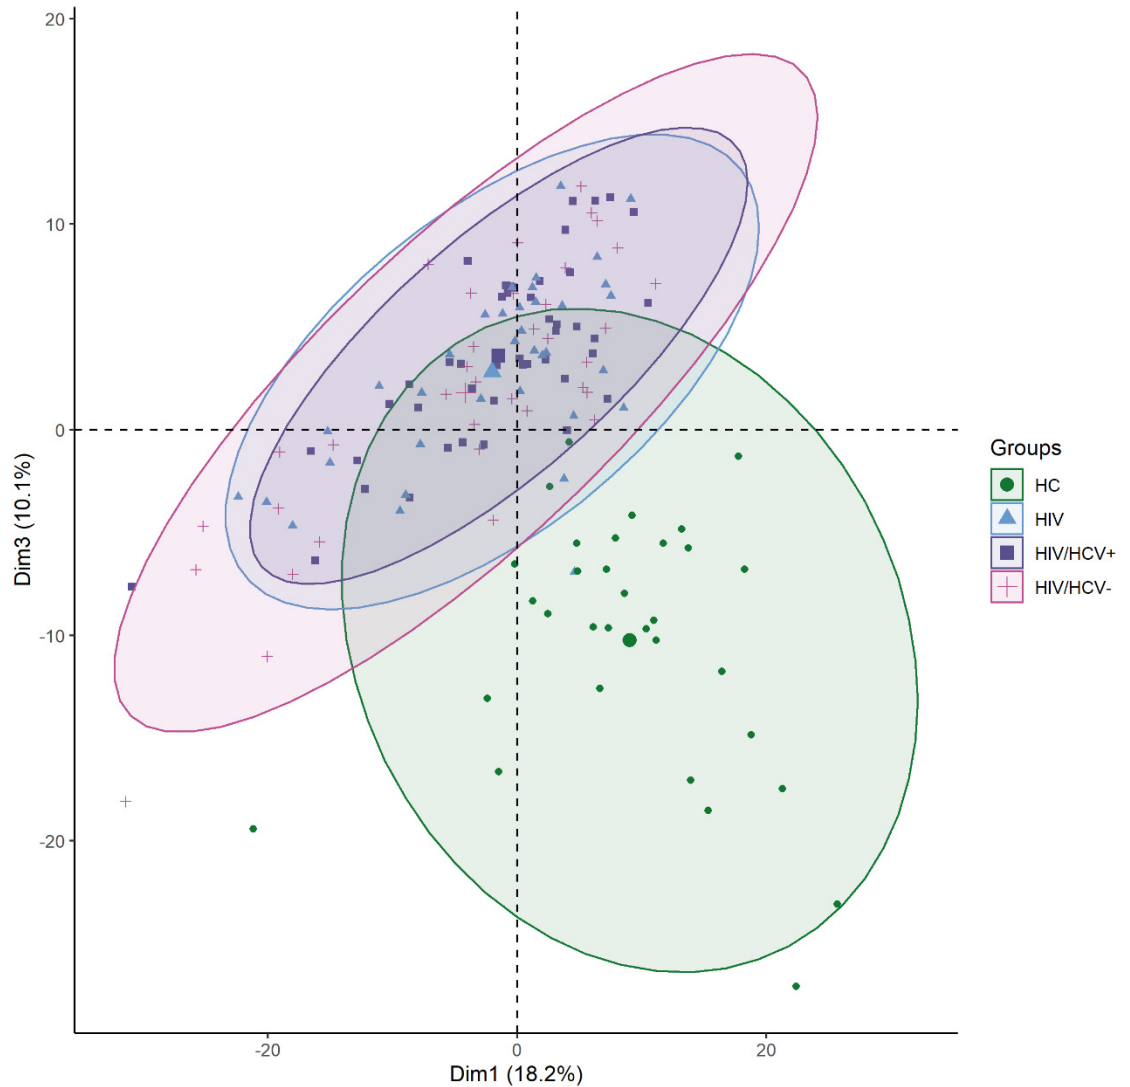

**Figure S1. Partial least squares discriminant analysis (PLS-DA) regression of miRNA normalized expression data.** PLS-DA method has been used to discriminate between patients in the HIV groups and healthy controls (HC). Each symbol represent the miRNA profile of PBMCs samples in HIV/HCV+ (purple), HIV/HCV- (pink), HIV (blue) and HC (green) patients. Symbols in bold represent the average of its group.

### 3. Supplementary Tables

**Table S1.** Differentially expressed miRNAs in HIV/HCV+ patients.

**Table S2.** MicroRNA-gene target enrichment analysis.

**Table S3.** Pathway enrichment analysis.

**Table S4.** Differentially expressed miRNAs in HIV/HCV- patients.

**Table S5.** Differentially expressed miRNAs in HIV patients.

**Table S6.** Top enriched target genes for specific miRNA deregulation signature in HIV/HCV+ patients.

**Table S7.** Top enriched target genes for specific miRNAs deregulation signature in HIV/HCV- patients exclusively.

**Table S8.** Top enriched target genes for specific miRNAs deregulation signature in HIV patients exclusively

**Table S1. Differentially expressed miRNAs in HIV/HCV+ patients.** Significant differentially expressed (SDE) miRNAs in HIV/HCV+ patients compared to healthy controls. Each column represent: the SDE miRNA identifier (miRBase format), the Log2FC indicating the expression fold change between HIV/HCV+ and healthy patients, and the adjusted p-value (FDR, corrected for multiple testing with the Benjamin-Hochberg procedure).

| miRNAs            | LogFC  | FDR   |
|-------------------|--------|-------|
| hsa-miR-101-5p    | -0,719 | 0     |
| hsa-miR-10395-3p  | -1,18  | 0     |
| hsa-miR-10399-3p  | 0,703  | 0     |
| hsa-miR-103a-2-5p | 0,608  | 0,014 |
| hsa-miR-10401-3p  | -2,311 | 0     |
| hsa-miR-11400     | 0,901  | 0     |
| hsa-miR-12135     | -0,85  | 0     |
| hsa-miR-122-5p    | -1,581 | 0     |
| hsa-miR-1246      | -1,323 | 0,004 |
| hsa-miR-1248      | -3,185 | 0     |
| hsa-miR-1249-3p   | -1,513 | 0     |
| hsa-miR-125a-5p   | -1,289 | 0     |
| hsa-miR-125b-2-3p | -0,692 | 0,002 |
| hsa-miR-125b-5p   | -1,473 | 0     |
| hsa-miR-126-5p    | 0,667  | 0,001 |
| hsa-miR-1260a     | -1,132 | 0     |
| hsa-miR-1260b     | -1,118 | 0     |
| hsa-miR-1268a     | -0,671 | 0     |
| hsa-miR-127-3p    | 0,775  | 0     |
| hsa-miR-127-5p    | 0,635  | 0,018 |
| hsa-miR-1275      | -0,635 | 0     |

|                   |        |       |
|-------------------|--------|-------|
| hsa-miR-1277-5p   | -0,626 | 0,004 |
| hsa-miR-1285-3p   | -0,849 | 0     |
| hsa-miR-1291      | -0,783 | 0     |
| hsa-miR-1306-5p   | -1,254 | 0     |
| hsa-miR-1307-5p   | -0,828 | 0,001 |
| hsa-miR-132-5p    | -0,762 | 0     |
| hsa-miR-134-5p    | 0,86   | 0     |
| hsa-miR-1343-3p   | -0,9   | 0     |
| hsa-miR-136-3p    | 0,608  | 0,025 |
| hsa-miR-138-5p    | -0,639 | 0,001 |
| hsa-miR-139-5p    | 1,189  | 0     |
| hsa-miR-142-3p    | -0,791 | 0     |
| hsa-miR-143-3p    | 0,901  | 0     |
| hsa-miR-146a-5p   | 1,538  | 0     |
| hsa-miR-146b-5p   | 1,217  | 0     |
| hsa-miR-148a-5p   | 0,962  | 0     |
| hsa-miR-148b-3p   | 0,752  | 0     |
| hsa-miR-148b-5p   | 0,624  | 0     |
| hsa-miR-150-5p    | -1,297 | 0     |
| hsa-miR-151a-3p   | 0,592  | 0     |
| hsa-miR-152-5p    | 0,649  | 0,004 |
| hsa-miR-154-5p    | 1,11   | 0     |
| hsa-miR-181b-2-3p | -0,602 | 0,01  |
| hsa-miR-1908-5p   | -0,725 | 0     |
| hsa-miR-193a-3p   | -0,961 | 0     |
| hsa-miR-193b-3p   | -1,099 | 0     |
| hsa-miR-196a-5p   | 0,864  | 0,002 |
| hsa-miR-197-3p    | -0,751 | 0     |
| hsa-miR-204-5p    | 0,745  | 0,015 |
| hsa-miR-20a-3p    | -0,751 | 0     |
| hsa-miR-21-3p     | 1,144  | 0     |
| hsa-miR-210-5p    | -1,625 | 0     |
| hsa-miR-2110      | -0,689 | 0     |
| hsa-miR-23a-5p    | -1,226 | 0     |
| hsa-miR-24-3p     | 0,617  | 0     |
| hsa-miR-2467-5p   | 1,057  | 0     |
| hsa-miR-25-5p     | -1,052 | 0     |
| hsa-miR-296-5p    | -1,701 | 0     |
| hsa-miR-299-3p    | 0,666  | 0,033 |
| hsa-miR-29a-5p    | -0,797 | 0     |
| hsa-miR-29c-3p    | -0,705 | 0     |
| hsa-miR-30a-5p    | 0,647  | 0     |
| hsa-miR-31-5p     | -0,592 | 0,004 |
| hsa-miR-3142      | -1,827 | 0     |
| hsa-miR-3176      | 0,625  | 0,001 |
| hsa-miR-3196      | -1,477 | 0     |

|                 |        |       |
|-----------------|--------|-------|
| hsa-miR-32-3p   | -0,656 | 0     |
| hsa-miR-32-5p   | -0,778 | 0     |
| hsa-miR-320c    | -0,639 | 0     |
| hsa-miR-320d    | -0,616 | 0     |
| hsa-miR-324-5p  | 0,604  | 0     |
| hsa-miR-328-3p  | -0,725 | 0     |
| hsa-miR-329-3p  | 0,615  | 0,041 |
| hsa-miR-331-3p  | -0,79  | 0     |
| hsa-miR-339-3p  | -0,631 | 0     |
| hsa-miR-33a-5p  | -0,737 | 0     |
| hsa-miR-342-5p  | -0,942 | 0     |
| hsa-miR-34a-5p  | 0,602  | 0,001 |
| hsa-miR-3605-3p | -0,98  | 0     |
| hsa-miR-3609    | -1,979 | 0     |
| hsa-miR-361-3p  | -0,636 | 0     |
| hsa-miR-3614-5p | 0,988  | 0     |
| hsa-miR-362-3p  | -0,845 | 0     |
| hsa-miR-362-5p  | 1,3    | 0     |
| hsa-miR-3651    | -0,99  | 0     |
| hsa-miR-3677-3p | 1,334  | 0     |
| hsa-miR-3690    | -0,653 | 0,002 |
| hsa-miR-376a-3p | 0,695  | 0,019 |
| hsa-miR-379-5p  | 1,252  | 0     |
| hsa-miR-381-3p  | 0,843  | 0,001 |
| hsa-miR-382-3p  | 1,233  | 0     |
| hsa-miR-3960    | -2,591 | 0     |
| hsa-miR-410-3p  | 0,86   | 0     |
| hsa-miR-411-5p  | 0,941  | 0     |
| hsa-miR-412-5p  | 1,881  | 0     |
| hsa-miR-423-3p  | -0,631 | 0     |
| hsa-miR-423-5p  | -1,081 | 0     |
| hsa-miR-432-5p  | 0,635  | 0,012 |
| hsa-miR-443b-3p | -1,009 | 0,002 |
| hsa-miR-443b-5p | -1,364 | 0     |
| hsa-miR-4454    | -1,23  | 0     |
| hsa-miR-4508    | -2,586 | 0     |
| hsa-miR-451a    | 0,934  | 0,024 |
| hsa-miR-4531    | 0,623  | 0,006 |
| hsa-miR-4645-3p | 1,016  | 0     |
| hsa-miR-4687-5p | -1,494 | 0     |
| hsa-miR-4772-3p | -1,188 | 0     |
| hsa-miR-4772-5p | -1,084 | 0     |
| hsa-miR-485-5p  | -0,62  | 0,019 |
| hsa-miR-486-3p  | -1,047 | 0     |
| hsa-miR-493-3p  | 0,74   | 0,002 |
| hsa-miR-493-5p  | 0,739  | 0,002 |

|                  |        |       |
|------------------|--------|-------|
| hsa-miR-495-3p   | 0,655  | 0,016 |
| hsa-miR-496      | 1,057  | 0     |
| hsa-miR-502-3p   | -0,704 | 0     |
| hsa-miR-505-5p   | -1,38  | 0     |
| hsa-miR-5100     | -0,933 | 0     |
| hsa-miR-5193     | -0,616 | 0,002 |
| hsa-miR-532-3p   | -0,629 | 0     |
| hsa-miR-548ad-5p | -0,644 | 0     |
| hsa-miR-548ae-5p | -0,749 | 0     |
| hsa-miR-548au-5p | -0,734 | 0     |
| hsa-miR-548ax    | -0,863 | 0     |
| hsa-miR-548ay-5p | -0,714 | 0     |
| hsa-miR-5701     | -1,173 | 0     |
| hsa-miR-582-3p   | 0,86   | 0     |
| hsa-miR-582-5p   | 0,594  | 0,001 |
| hsa-miR-589-3p   | -0,729 | 0     |
| hsa-miR-589-5p   | 0,675  | 0     |
| hsa-miR-590-3p   | -0,998 | 0     |
| hsa-miR-624-5p   | -0,814 | 0     |
| hsa-miR-629-5p   | 0,848  | 0     |
| hsa-miR-642a-3p  | -0,898 | 0     |
| hsa-miR-642a-5p  | -0,688 | 0,001 |
| hsa-miR-6511a-3p | -0,842 | 0     |
| hsa-miR-6511b-3p | -1,24  | 0     |
| hsa-miR-654-5p   | 0,793  | 0,001 |
| hsa-miR-664b-5p  | -0,638 | 0,001 |
| hsa-miR-6724-5p  | -0,836 | 0     |
| hsa-miR-6803-3p  | -1,577 | 0     |
| hsa-miR-6837-3p  | 0,909  | 0     |
| hsa-miR-7-5p     | 1,035  | 0     |
| hsa-miR-7704     | -1,334 | 0     |
| hsa-miR-7976     | -0,726 | 0     |
| hsa-miR-7977     | -1,299 | 0     |
| hsa-miR-877-5p   | -1,194 | 0     |
| hsa-miR-889-3p   | 0,72   | 0,006 |
| hsa-miR-9-5p     | 0,719  | 0     |
| hsa-miR-95-3p    | -0,65  | 0     |
| hsa-miR-98-5p    | 0,653  | 0     |
| hsa-miR-9985     | -0,926 | 0     |
| hsa-miR-99a-5p   | -1,009 | 0     |

**Table S2. MicroRNA-gene target enrichment analysis.** Target-enrichment analysis for the SDE miRNAs found in each comparison (HIV/HCV+ vs HC, HIV/HCV- vs HC, and HIV vs HC). Here we have included the target gene symbol (Gene\_symbol), the adjusted p-value (FDR, corrected p-value for multiple testing performed with the Benjamin–Hochberg procedure), the number of SDE miRNAs that interact each enriched gene (Num\_interactions), and the miRNA identifier in miRBase format.

| Analysis     | Gene_symbol | FDR   | Num_interactions | miRNAs                                                                                                                                                                     |
|--------------|-------------|-------|------------------|----------------------------------------------------------------------------------------------------------------------------------------------------------------------------|
| HIV/HCV<br>+ | RPS2        | 0,002 | 10               | hsa-miR-423-5p / hsa-miR-361-3p / hsa-miR-25-5p / hsa-miR-423-3p / hsa-miR-324-5p / hsa-miR-331-3p / hsa-miR-328-3p / hsa-miR-125a-5p / hsa-miR-34a-5p / hsa-miR-196a-5p   |
| HIV/HCV<br>+ | BCL11A      | 0,003 | 8                | hsa-miR-148b-3p / hsa-miR-29c-3p / hsa-miR-196a-5p / hsa-miR-32-5p / hsa-miR-486-3p / hsa-miR-30a-5p / hsa-miR-2110 / hsa-miR-138-5p                                       |
| HIV/HCV<br>+ | MEGF9       | 0,003 | 6                | hsa-miR-151a-3p / hsa-miR-877-5p / hsa-miR-197-3p / hsa-miR-125b-5p / hsa-miR-125a-5p / hsa-miR-432-5p                                                                     |
| HIV/HCV<br>+ | COPA        | 0,004 | 10               | hsa-miR-193b-3p / hsa-miR-423-3p / hsa-miR-1260b / hsa-miR-127-5p / hsa-miR-376a-3p / hsa-miR-142-3p / hsa-miR-146b-5p / hsa-miR-146a-5p / hsa-miR-589-5p / hsa-miR-122-5p |
| HIV/HCV<br>+ | NFKB2       | 0,006 | 4                | hsa-miR-193b-3p / hsa-miR-98-5p / hsa-miR-423-5p / hsa-miR-143-3p                                                                                                          |
| HIV/HCV<br>+ | TGM2        | 0,006 | 5                | hsa-miR-1285-3p / hsa-miR-34a-5p / hsa-miR-7-5p / hsa-miR-30a-5p / hsa-miR-127-3p                                                                                          |
| HIV/HCV<br>+ | THAP12      | 0,006 | 4                | hsa-miR-34a-5p / hsa-miR-7-5p / hsa-miR-98-5p / hsa-miR-24-3p                                                                                                              |
| HIV/HCV<br>+ | NFKB1       | 0,01  | 7                | hsa-miR-9-5p / hsa-miR-146a-5p / hsa-miR-146b-5p / hsa-miR-139-5p / hsa-miR-138-5p / hsa-miR-339-3p / hsa-miR-34a-5p                                                       |
| HIV/HCV<br>+ | ITGBL1      | 0,013 | 7                | hsa-miR-146a-5p / hsa-miR-362-3p / hsa-miR-329-3p / hsa-miR-889-3p / hsa-miR-20a-3p / hsa-miR-382-3p / hsa-miR-33a-5p                                                      |
| HIV/HCV<br>+ | MDN1        | 0,013 | 7                | hsa-miR-642a-5p / hsa-miR-1260b / hsa-miR-146b-5p / hsa-miR-146a-5p / hsa-miR-589-5p / hsa-miR-362-3p / hsa-miR-329-3p                                                     |
| HIV/HCV<br>+ | PIK3CG      | 0,013 | 10               | hsa-miR-148b-3p / hsa-miR-7-5p / hsa-miR-142-3p / hsa-miR-1277-5p / hsa-miR-362-3p / hsa-miR-329-3p / hsa-miR-410-3p / hsa-miR-127-3p / hsa-miR-34a-5p / hsa-miR-125a-5p   |
| HIV/HCV<br>+ | NDE1        | 0,013 | 7                | hsa-miR-30a-5p / hsa-miR-877-5p / hsa-miR-423-5p / hsa-miR-423-3p / hsa-miR-151a-3p / hsa-miR-99a-5p / hsa-miR-3196                                                        |
| HIV/HCV<br>+ | DDX56       | 0,013 | 4                | hsa-miR-34a-5p / hsa-miR-423-3p / hsa-miR-331-3p / hsa-miR-328-3p                                                                                                          |
| HIV/HCV<br>+ | PRKCH       | 0,013 | 7                | hsa-miR-432-5p / hsa-miR-376a-3p / hsa-miR-493-3p / hsa-miR-4531 / hsa-miR-1343-3p / hsa-miR-3690 / hsa-miR-24-3p                                                          |
| HIV/HCV<br>+ | CASC4       | 0,013 | 4                | hsa-miR-151a-3p / hsa-miR-125a-5p / hsa-miR-381-3p / hsa-miR-485-5p                                                                                                        |
| HIV/HCV<br>+ | MCL1        | 0,023 | 16               | hsa-miR-193a-3p / hsa-miR-29c-3p / hsa-miR-193b-3p / hsa-miR-582-5p /                                                                                                      |



|              |          |       |    |  |                                                                                                                                                                                                                                                                                                                    |
|--------------|----------|-------|----|--|--------------------------------------------------------------------------------------------------------------------------------------------------------------------------------------------------------------------------------------------------------------------------------------------------------------------|
|              |          |       |    |  | hsa-miR-148b-5p / hsa-miR-125b-5p /<br>hsa-miR-151a-3p / hsa-miR-139-5p /<br>hsa-miR-495-3p / hsa-miR-5193 / hsa-<br>miR-32-5p / hsa-miR-125a-5p / hsa-miR-<br>34a-5p / hsa-miR-339-3p / hsa-miR-320c<br>/ hsa-miR-320d                                                                                            |
| HIV/HCV<br>+ | ATP5B    | 0,023 | 7  |  | hsa-miR-193b-3p / hsa-miR-423-5p /<br>hsa-miR-339-3p / hsa-miR-324-5p / hsa-<br>miR-331-3p / hsa-miR-125b-5p / hsa-<br>miR-24-3p                                                                                                                                                                                   |
| HIV/HCV<br>+ | TLR2     | 0,024 | 5  |  | hsa-miR-146a-5p / hsa-miR-154-5p /<br>hsa-miR-101-5p / hsa-miR-143-3p / hsa-<br>miR-23a-5p                                                                                                                                                                                                                         |
| HIV/HCV<br>+ | TRPM3    | 0,024 | 5  |  | hsa-miR-204-5p / hsa-miR-443b-5p /<br>hsa-miR-1260b / hsa-miR-1260a / hsa-<br>miR-532-3p                                                                                                                                                                                                                           |
| HIV/HCV<br>+ | POLD1    | 0,027 | 4  |  | hsa-miR-24-3p / hsa-miR-193b-3p / hsa-<br>miR-34a-5p / hsa-miR-324-5p                                                                                                                                                                                                                                              |
| HIV/HCV<br>+ | HOTAIR   | 0,027 | 4  |  | hsa-miR-34a-5p / hsa-miR-331-3p / hsa-<br>miR-148b-3p / hsa-miR-126-5p                                                                                                                                                                                                                                             |
| HIV/HCV<br>+ | SPTBN1   | 0,028 | 6  |  | hsa-miR-9-5p / hsa-miR-34a-5p / hsa-<br>miR-589-3p / hsa-miR-193b-3p / hsa-<br>miR-423-3p / hsa-miR-331-3p                                                                                                                                                                                                         |
| HIV/HCV<br>+ | GATAD2B  | 0,028 | 14 |  | hsa-miR-590-3p / hsa-miR-32-5p / hsa-<br>miR-30a-5p / hsa-miR-505-5p / hsa-miR-<br>193b-3p / hsa-miR-331-3p / hsa-miR-<br>1260b / hsa-miR-642a-5p / hsa-miR-7-5p<br>/ hsa-miR-29a-5p / hsa-miR-589-3p /<br>hsa-miR-1260a / hsa-miR-532-3p / hsa-<br>miR-150-5p                                                     |
| HIV/HCV<br>+ | DUS1L    | 0,028 | 3  |  | hsa-miR-7-5p / hsa-miR-24-3p / hsa-<br>miR-193b-3p                                                                                                                                                                                                                                                                 |
| HIV/HCV<br>+ | S100A8   | 0,028 | 3  |  | hsa-miR-98-5p / hsa-miR-125b-5p / hsa-<br>miR-24-3p                                                                                                                                                                                                                                                                |
| HIV/HCV<br>+ | CSTB     | 0,028 | 3  |  | hsa-miR-877-5p / hsa-miR-423-5p / hsa-<br>miR-125b-2-3p                                                                                                                                                                                                                                                            |
| HIV/HCV<br>+ | RHOV     | 0,029 | 5  |  | hsa-miR-148b-3p / hsa-miR-9-5p / hsa-<br>miR-193b-3p / hsa-miR-331-3p / hsa-<br>miR-125b-5p                                                                                                                                                                                                                        |
| HIV/HCV<br>+ | PPP1R12C | 0,032 | 6  |  | hsa-miR-32-5p / hsa-miR-125b-2-3p /<br>hsa-miR-1260b / hsa-miR-1260a / hsa-<br>miR-532-3p / hsa-miR-1306-5p                                                                                                                                                                                                        |
| HIV/HCV<br>+ | HUWE1    | 0,033 | 9  |  | hsa-miR-34a-5p / hsa-miR-877-5p / hsa-<br>miR-193b-3p / hsa-miR-29c-3p / hsa-<br>miR-125b-5p / hsa-miR-196a-5p / hsa-<br>miR-410-3p / hsa-miR-590-3p / hsa-miR-<br>1277-5p                                                                                                                                         |
| HIV/HCV<br>+ | DYRK2    | 0,034 | 17 |  | hsa-miR-98-5p / hsa-miR-197-3p / hsa-<br>miR-196a-5p / hsa-miR-24-3p / hsa-miR-<br>590-3p / hsa-miR-193a-3p / hsa-miR-<br>193b-3p / hsa-miR-3609 / hsa-miR-496 /<br>hsa-miR-5701 / hsa-miR-1275 / hsa-miR-<br>629-5p / hsa-miR-362-3p / hsa-miR-329-<br>3p / hsa-miR-125a-5p / hsa-miR-125b-5p<br>/ hsa-miR-582-5p |
| HIV/HCV<br>+ | SMO      | 0,037 | 4  |  | hsa-miR-125b-5p / hsa-miR-324-5p /<br>hsa-miR-331-3p / hsa-miR-20a-3p                                                                                                                                                                                                                                              |
| HIV/HCV<br>+ | IRAK1    | 0,037 | 6  |  | hsa-miR-146a-5p / hsa-miR-146b-5p /<br>hsa-miR-193b-3p / hsa-miR-423-3p /<br>hsa-miR-328-3p / hsa-miR-142-3p                                                                                                                                                                                                       |
| HIV/HCV<br>+ | PROSER1  | 0,037 | 4  |  | hsa-miR-34a-5p / hsa-miR-98-5p / hsa-<br>miR-24-3p / hsa-miR-196a-5p                                                                                                                                                                                                                                               |

|              |         |       |    |                                                                                                                                                                                                                                                                                              |
|--------------|---------|-------|----|----------------------------------------------------------------------------------------------------------------------------------------------------------------------------------------------------------------------------------------------------------------------------------------------|
| HIV/HCV<br>+ | CASP9   | 0,037 | 4  | hsa-miR-193b-3p / hsa-miR-7-5p / hsa-miR-582-5p / hsa-miR-34a-5p                                                                                                                                                                                                                             |
| HIV/HCV<br>+ | IL1RL2  | 0,037 | 5  | hsa-miR-146a-5p / hsa-miR-146b-5p / hsa-miR-6511b-3p / hsa-miR-6511a-3p / hsa-miR-361-3p                                                                                                                                                                                                     |
| HIV/HCV<br>+ | WDFY2   | 0,038 | 7  | hsa-miR-30a-5p / hsa-miR-1260b / hsa-miR-1260a / hsa-miR-5100 / hsa-miR-532-3p / hsa-miR-150-5p / hsa-miR-24-3p                                                                                                                                                                              |
| HIV/HCV<br>+ | NOTCH1  | 0,043 | 9  | hsa-miR-24-3p / hsa-miR-34a-5p / hsa-miR-30a-5p / hsa-miR-139-5p / hsa-miR-204-5p / hsa-miR-9-5p / hsa-miR-410-3p / hsa-miR-146a-5p / hsa-miR-296-5p                                                                                                                                         |
| HIV/HCV<br>+ | ABCC1   | 0,043 | 7  | hsa-miR-7-5p / hsa-miR-134-5p / hsa-miR-9-5p / hsa-miR-98-5p / hsa-miR-125b-5p / hsa-miR-1291 / hsa-miR-361-3p                                                                                                                                                                               |
| HIV/HCV<br>+ | VEGFA   | 0,043 | 17 | hsa-miR-134-5p / hsa-miR-150-5p / hsa-miR-125a-5p / hsa-miR-34a-5p / hsa-miR-29c-3p / hsa-miR-9-5p / hsa-miR-1277-5p / hsa-miR-423-3p / hsa-miR-299-3p / hsa-miR-495-3p / hsa-miR-410-3p / hsa-miR-362-3p / hsa-miR-329-3p / hsa-miR-5193 / hsa-miR-126-5p / hsa-miR-101-5p / hsa-miR-296-5p |
| HIV/HCV<br>+ | PA2G4   | 0,043 | 6  | hsa-miR-146a-5p / hsa-miR-24-3p / hsa-miR-423-5p / hsa-miR-324-5p / hsa-miR-7-5p / hsa-miR-423-3p                                                                                                                                                                                            |
| HIV/HCV<br>+ | GORASP2 | 0,043 | 4  | hsa-miR-197-3p / hsa-miR-34a-5p / hsa-miR-877-5p / hsa-miR-24-3p                                                                                                                                                                                                                             |
| HIV/HCV<br>+ | ICAM1   | 0,043 | 8  | hsa-miR-31-5p / hsa-miR-98-5p / hsa-miR-146a-5p / hsa-miR-485-5p / hsa-miR-2467-5p / hsa-miR-362-3p / hsa-miR-329-3p / hsa-miR-32-5p                                                                                                                                                         |
| HIV/HCV<br>+ | EZH2    | 0,043 | 9  | hsa-miR-98-5p / hsa-miR-138-5p / hsa-miR-193b-3p / hsa-miR-1260b / hsa-miR-1260a / hsa-miR-532-3p / hsa-miR-150-5p / hsa-miR-320c / hsa-miR-101-5p                                                                                                                                           |
| HIV/HCV<br>+ | SYNE2   | 0,043 | 5  | hsa-miR-193b-3p / hsa-miR-148b-3p / hsa-miR-9-5p / hsa-miR-34a-5p / hsa-miR-485-5p                                                                                                                                                                                                           |
| HIV/HCV<br>+ | SHCBP1  | 0,043 | 7  | hsa-miR-193b-3p / hsa-miR-33a-5p / hsa-miR-32-5p / hsa-miR-146b-5p / hsa-miR-146a-5p / hsa-miR-589-5p / hsa-miR-3614-5p                                                                                                                                                                      |
| HIV/HCV<br>+ | UGT8    | 0,043 | 8  | hsa-miR-148b-3p / hsa-miR-1260b / hsa-miR-362-3p / hsa-miR-329-3p / hsa-miR-126-5p / hsa-miR-324-5p / hsa-miR-20a-3p / hsa-miR-4454                                                                                                                                                          |
| HIV/HCV<br>+ | OSBP2   | 0,043 | 4  | hsa-miR-148b-3p / hsa-miR-122-5p / hsa-miR-1277-5p / hsa-miR-410-3p                                                                                                                                                                                                                          |
| HIV/HCV<br>+ | F2      | 0,043 | 11 | hsa-miR-9-5p / hsa-miR-1260b / hsa-miR-1260a / hsa-miR-423-3p / hsa-miR-532-3p / hsa-miR-1343-3p / hsa-miR-1306-5p / hsa-miR-3614-5p / hsa-miR-122-5p / hsa-miR-25-5p / hsa-miR-485-5p                                                                                                       |
| HIV/HCV<br>+ | SLC52A2 | 0,043 | 3  | hsa-miR-122-5p / hsa-miR-7-5p / hsa-miR-24-3p                                                                                                                                                                                                                                                |
| HIV/HCV<br>+ | UBE2L3  | 0,043 | 3  | hsa-miR-122-5p / hsa-miR-423-5p / hsa-miR-125a-5p                                                                                                                                                                                                                                            |
| HIV/HCV<br>+ | ANXA7   | 0,043 | 3  | hsa-miR-122-5p / hsa-miR-324-5p / hsa-miR-196a-5p                                                                                                                                                                                                                                            |

|              |         |       |    |                                                                                                                                                                                                                                                                                                                  |
|--------------|---------|-------|----|------------------------------------------------------------------------------------------------------------------------------------------------------------------------------------------------------------------------------------------------------------------------------------------------------------------|
| HIV/HCV<br>+ | PHPT1   | 0,043 | 3  | hsa-miR-122-5p / hsa-miR-877-5p / hsa-miR-197-3p                                                                                                                                                                                                                                                                 |
| HIV/HCV<br>+ | SRRM2   | 0,043 | 6  | hsa-miR-34a-5p / hsa-miR-877-5p / hsa-miR-505-5p / hsa-miR-331-3p / hsa-miR-125b-5p / hsa-miR-31-5p                                                                                                                                                                                                              |
| HIV/HCV<br>+ | TYMS    | 0,043 | 5  | hsa-miR-193b-3p / hsa-miR-34a-5p / hsa-miR-99a-5p / hsa-miR-196a-5p / hsa-miR-193a-3p                                                                                                                                                                                                                            |
| HIV/HCV<br>+ | LAMC2   | 0,043 | 4  | hsa-miR-148b-3p / hsa-miR-7-5p / hsa-miR-29c-3p / hsa-miR-146a-5p                                                                                                                                                                                                                                                |
| HIV/HCV<br>+ | SERTAD2 | 0,043 | 11 | hsa-miR-7-5p / hsa-miR-98-5p / hsa-miR-33a-5p / hsa-miR-324-5p / hsa-miR-1277-5p / hsa-miR-4531 / hsa-miR-146b-5p / hsa-miR-146a-5p / hsa-miR-32-5p / hsa-miR-134-5p / hsa-miR-31-5p                                                                                                                             |
| HIV/HCV<br>+ | B4GALT3 | 0,043 | 3  | hsa-miR-34a-5p / hsa-miR-98-5p / hsa-miR-125b-5p                                                                                                                                                                                                                                                                 |
| HIV/HCV<br>+ | RHOBTB3 | 0,043 | 11 | hsa-miR-98-5p / hsa-miR-432-5p / hsa-miR-379-5p / hsa-miR-146b-5p / hsa-miR-146a-5p / hsa-miR-664b-5p / hsa-miR-381-3p / hsa-miR-181b-2-3p / hsa-miR-411-5p / hsa-miR-590-3p / hsa-miR-342-5p                                                                                                                    |
| HIV/HCV<br>+ | MIS18A  | 0,043 | 6  | hsa-miR-24-3p / hsa-miR-505-5p / hsa-miR-1260b / hsa-miR-1260a / hsa-miR-532-3p / hsa-miR-150-5p                                                                                                                                                                                                                 |
| HIV/HCV<br>+ | POLR3H  | 0,043 | 4  | hsa-miR-423-5p / hsa-miR-423-3p / hsa-miR-324-5p / hsa-miR-331-3p                                                                                                                                                                                                                                                |
| HIV/HCV<br>+ | TRAP1   | 0,043 | 6  | hsa-miR-361-3p / hsa-miR-193b-3p / hsa-miR-324-5p / hsa-miR-331-3p / hsa-miR-197-3p / hsa-miR-196a-5p                                                                                                                                                                                                            |
| HIV/HCV<br>+ | COX7C   | 0,043 | 3  | hsa-miR-193b-3p / hsa-miR-331-3p / hsa-miR-125b-5p                                                                                                                                                                                                                                                               |
| HIV/HCV<br>+ | SPEN    | 0,043 | 7  | hsa-miR-193b-3p / hsa-miR-423-3p / hsa-miR-324-5p / hsa-miR-331-3p / hsa-miR-328-3p / hsa-miR-125b-5p / hsa-miR-196a-5p                                                                                                                                                                                          |
| HIV/HCV<br>+ | GGT7    | 0,043 | 4  | hsa-miR-331-3p / hsa-miR-197-3p / hsa-miR-6511b-3p / hsa-miR-6511a-3p                                                                                                                                                                                                                                            |
| HIV/HCV<br>+ | SIRT7   | 0,043 | 3  | hsa-miR-34a-5p / hsa-miR-125b-5p / hsa-miR-125a-5p                                                                                                                                                                                                                                                               |
| HIV/HCV<br>+ | UHRF1   | 0,045 | 5  | hsa-miR-146a-5p / hsa-miR-34a-5p / hsa-miR-7-5p / hsa-miR-146b-5p / hsa-miR-9-5p                                                                                                                                                                                                                                 |
| HIV/HCV-     | BCL2    | 0     | 18 | hsa-miR-204-5p / hsa-miR-29c-3p / hsa-miR-181c-5p / hsa-miR-33b-5p / hsa-miR-451a / hsa-miR-125b-5p / hsa-miR-200b-3p / hsa-miR-7-5p / hsa-miR-148a-3p / hsa-miR-182-5p / hsa-miR-143-3p / hsa-miR-126-3p / hsa-miR-18a-5p / hsa-miR-125a-5p / hsa-miR-224-5p / hsa-miR-139-5p / hsa-miR-376c-3p / hsa-miR-98-5p |
| HIV/HCV-     | MEGF9   | 0,008 | 6  | hsa-miR-151a-3p / hsa-miR-877-5p / hsa-miR-197-3p / hsa-miR-125b-5p / hsa-miR-125a-5p / hsa-miR-432-5p                                                                                                                                                                                                           |
| HIV/HCV-     | NFKB2   | 0,018 | 4  | hsa-miR-193b-3p / hsa-miR-98-5p / hsa-miR-423-5p / hsa-miR-143-3p                                                                                                                                                                                                                                                |
| HIV/HCV-     | PRKAB1  | 0,018 | 9  | hsa-miR-122-5p / hsa-miR-148b-3p / hsa-miR-642a-5p / hsa-miR-627-3p / hsa-miR-432-5p / hsa-miR-1260b / hsa-                                                                                                                                                                                                      |

|          |          |       |    |                                                                                                                                                                                                                                                 |
|----------|----------|-------|----|-------------------------------------------------------------------------------------------------------------------------------------------------------------------------------------------------------------------------------------------------|
| HIV/HCV- | MTRNR2L2 | 0,018 | 5  | miR-1260a / hsa-miR-532-3p / hsa-miR-150-5p<br>hsa-miR-376c-3p / hsa-miR-381-3p / hsa-miR-485-3p / hsa-miR-493-5p / hsa-miR-382-5p                                                                                                              |
| HIV/HCV- | BCL11A   | 0,027 | 7  | hsa-miR-148b-3p / hsa-miR-29c-3p / hsa-miR-196a-5p / hsa-miR-32-5p / hsa-miR-30a-5p / hsa-miR-2110 / hsa-miR-376c-3p                                                                                                                            |
| HIV/HCV- | HK2      | 0,029 | 5  | hsa-miR-143-3p / hsa-miR-125a-5p / hsa-miR-125b-5p / hsa-miR-98-5p / hsa-miR-199a-5p                                                                                                                                                            |
| HIV/HCV- | ERO1B    | 0,029 | 5  | hsa-miR-33a-5p / hsa-miR-1185-1-3p / hsa-miR-376c-3p / hsa-miR-432-5p / hsa-miR-376a-3p                                                                                                                                                         |
| HIV/HCV- | MDN1     | 0,029 | 7  | hsa-miR-642a-5p / hsa-miR-1260b / hsa-miR-146b-5p / hsa-miR-146a-5p / hsa-miR-589-5p / hsa-miR-362-3p / hsa-miR-329-3p                                                                                                                          |
| HIV/HCV- | TMEM170B | 0,029 | 12 | hsa-miR-1271-5p / hsa-miR-376c-3p / hsa-miR-495-3p / hsa-miR-182-5p / hsa-miR-183-5p / hsa-miR-33b-5p / hsa-miR-33a-5p / hsa-miR-877-5p / hsa-miR-4685-3p / hsa-miR-1248 / hsa-miR-3916 / hsa-miR-7977                                          |
| HIV/HCV- | PIK3CG   | 0,029 | 10 | hsa-miR-126-3p / hsa-miR-148b-3p / hsa-miR-7-5p / hsa-miR-142-3p / hsa-miR-362-3p / hsa-miR-329-3p / hsa-miR-410-3p / hsa-miR-548e-3p / hsa-miR-127-3p / hsa-miR-125a-5p                                                                        |
| HIV/HCV- | PRKCH    | 0,029 | 7  | hsa-miR-376c-3p / hsa-miR-432-5p / hsa-miR-376a-3p / hsa-miR-493-3p / hsa-miR-1343-3p / hsa-miR-26a-2-3p / hsa-miR-24-3p                                                                                                                        |
| HIV/HCV- | COPA     | 0,029 | 9  | hsa-miR-193b-3p / hsa-miR-1260b / hsa-miR-127-5p / hsa-miR-376a-3p / hsa-miR-142-3p / hsa-miR-146b-5p / hsa-miR-146a-5p / hsa-miR-589-5p / hsa-miR-122-5p                                                                                       |
| HIV/HCV- | BBS4     | 0,029 | 4  | hsa-miR-376c-3p / hsa-miR-127-5p / hsa-miR-432-5p / hsa-miR-382-5p                                                                                                                                                                              |
| HIV/HCV- | IKBKB    | 0,044 | 5  | hsa-miR-199a-5p / hsa-miR-151a-3p / hsa-miR-451a / hsa-miR-148a-3p / hsa-miR-200b-3p                                                                                                                                                            |
| HIV/HCV- | SHCBP1   | 0,044 | 8  | hsa-miR-193b-3p / hsa-miR-33a-5p / hsa-miR-32-5p / hsa-miR-200b-3p / hsa-miR-146b-5p / hsa-miR-146a-5p / hsa-miR-589-5p / hsa-miR-3614-5p                                                                                                       |
| HIV/HCV- | TLR2     | 0,044 | 5  | hsa-miR-146a-5p / hsa-miR-154-5p / hsa-miR-101-5p / hsa-miR-143-3p / hsa-miR-23a-5p                                                                                                                                                             |
| HIV/HCV- | CXCR4    | 0,045 | 6  | hsa-miR-146a-5p / hsa-miR-224-5p / hsa-miR-150-5p / hsa-miR-139-5p / hsa-miR-126-3p / hsa-miR-204-5p                                                                                                                                            |
| HIV/HCV- | KRAS     | 0,045 | 14 | hsa-miR-143-3p / hsa-miR-181c-5p / hsa-miR-126-3p / hsa-miR-193b-3p / hsa-miR-134-5p / hsa-miR-224-5p / hsa-miR-452-5p / hsa-miR-3916 / hsa-miR-200b-3p / hsa-miR-193a-3p / hsa-miR-183-5p / hsa-miR-877-5p / hsa-miR-642a-5p / hsa-miR-199a-5p |
| HIV/HCV- | SERPINE1 | 0,045 | 7  | hsa-miR-204-5p / hsa-miR-99a-5p / hsa-miR-143-3p / hsa-miR-148a-3p / hsa-                                                                                                                                                                       |

|          |          |                |    |                                                                                                                                                                                                                                                               |
|----------|----------|----------------|----|---------------------------------------------------------------------------------------------------------------------------------------------------------------------------------------------------------------------------------------------------------------|
|          |          |                |    | miR-486-5p / hsa-miR-30a-5p / hsa-miR-224-5p                                                                                                                                                                                                                  |
| HIV/HCV- | FBXO7    | 0,045          | 3  | hsa-miR-122-5p / hsa-miR-877-5p / hsa-miR-127-5p                                                                                                                                                                                                              |
| HIV/HCV- | S100A8   | 0,045          | 3  | hsa-miR-98-5p / hsa-miR-125b-5p / hsa-miR-24-3p                                                                                                                                                                                                               |
| HIV/HCV- | DUS1L    | 0,045          | 3  | hsa-miR-7-5p / hsa-miR-24-3p / hsa-miR-193b-3p                                                                                                                                                                                                                |
| HIV/HCV- | CSTB     | 0,045          | 3  | hsa-miR-877-5p / hsa-miR-423-5p / hsa-miR-125b-2-3p                                                                                                                                                                                                           |
| HIV/HCV- | HNRNPK   | 0,045          | 7  | hsa-miR-450a-5p / hsa-miR-328-3p / hsa-miR-125b-5p / hsa-miR-1260b / hsa-miR-6511a-3p / hsa-miR-6511b-3p / hsa-miR-590-3p                                                                                                                                     |
| HIV/HCV- | EZH2     | 0,046          | 10 | hsa-miR-199a-5p / hsa-miR-98-5p / hsa-miR-193b-3p / hsa-miR-200b-3p / hsa-miR-1260b / hsa-miR-1260a / hsa-miR-532-3p / hsa-miR-150-5p / hsa-miR-126-3p / hsa-miR-101-5p                                                                                       |
| HIV/HCV- | WNT1     | 0,048          | 5  | hsa-miR-122-5p / hsa-miR-200b-3p / hsa-miR-148a-3p / hsa-miR-148b-3p / hsa-miR-139-5p                                                                                                                                                                         |
| HIV      | BCL2     | 0,0059303<br>6 | 15 | hsa-miR-204-5p / hsa-miR-29c-3p / hsa-miR-181c-5p / hsa-miR-33b-5p / hsa-miR-125b-5p / hsa-miR-7-5p / hsa-miR-148a-3p / hsa-miR-182-5p / hsa-miR-143-3p / hsa-miR-126-3p / hsa-miR-125a-5p / hsa-miR-224-5p / hsa-miR-494-3p / hsa-miR-139-5p / hsa-miR-98-5p |
| HIV      | MEGF9    | 0,0059303<br>6 | 6  | hsa-miR-151a-3p / hsa-miR-877-5p / hsa-miR-197-3p / hsa-miR-125b-5p / hsa-miR-125a-5p / hsa-miR-432-5p                                                                                                                                                        |
| HIV      | CXCR4    | 0,0109388<br>5 | 7  | hsa-miR-146a-5p / hsa-miR-224-5p / hsa-miR-150-5p / hsa-miR-139-5p / hsa-miR-126-3p / hsa-miR-494-3p / hsa-miR-204-5p                                                                                                                                         |
| HIV      | EZH2     | 0,0109388<br>5 | 11 | hsa-miR-199a-5p / hsa-miR-98-5p / hsa-miR-138-5p / hsa-miR-193b-3p / hsa-miR-1260b / hsa-miR-1260a / hsa-miR-3150b-3p / hsa-miR-532-3p / hsa-miR-150-5p / hsa-miR-126-3p / hsa-miR-101-5p                                                                     |
| HIV      | SERPINE1 | 0,0109388<br>5 | 8  | hsa-miR-204-5p / hsa-miR-99a-5p / hsa-miR-143-3p / hsa-miR-138-5p / hsa-miR-148a-3p / hsa-miR-486-5p / hsa-miR-30a-5p / hsa-miR-224-5p                                                                                                                        |
| HIV      | NFKB2    | 0,0109388<br>5 | 4  | hsa-miR-193b-3p / hsa-miR-98-5p / hsa-miR-423-5p / hsa-miR-143-3p                                                                                                                                                                                             |
| HIV      | BCL11A   | 0,0109388<br>5 | 7  | hsa-miR-148b-3p / hsa-miR-29c-3p / hsa-miR-196a-5p / hsa-miR-32-5p / hsa-miR-30a-5p / hsa-miR-2110 / hsa-miR-138-5p                                                                                                                                           |
| HIV      | SLC45A3  | 0,0235680<br>2 | 4  | hsa-miR-138-5p / hsa-miR-126-3p / hsa-miR-126-5p / hsa-miR-32-5p                                                                                                                                                                                              |
| HIV      | HK2      | 0,0251052<br>5 | 5  | hsa-miR-143-3p / hsa-miR-125a-5p / hsa-miR-125b-5p / hsa-miR-98-5p / hsa-miR-199a-5p                                                                                                                                                                          |
| HIV      | TLR2     | 0,0392282<br>8 | 5  | hsa-miR-146a-5p / hsa-miR-154-5p / hsa-miR-101-5p / hsa-miR-143-3p / hsa-miR-23a-5p                                                                                                                                                                           |
| HIV      | AKT1     | 0,0392282<br>8 | 13 | hsa-miR-125b-5p / hsa-miR-143-3p / hsa-miR-193b-3p / hsa-miR-542-3p / hsa-miR-27a-5p / hsa-miR-496 / hsa-                                                                                                                                                     |

|     |         |                |    |                                                                                                                                                                                                             |
|-----|---------|----------------|----|-------------------------------------------------------------------------------------------------------------------------------------------------------------------------------------------------------------|
|     |         |                |    | miR-99a-5p / hsa-miR-138-5p / hsa-miR-409-3p / hsa-miR-125a-5p / hsa-miR-494-3p / hsa-miR-185-3p / hsa-miR-126-3p                                                                                           |
| HIV | FBXO7   | 0,0477266<br>6 | 3  | hsa-miR-122-5p / hsa-miR-877-5p / hsa-miR-127-5p                                                                                                                                                            |
| HIV | S100A8  | 0,0477266<br>6 | 3  | hsa-miR-98-5p / hsa-miR-125b-5p / hsa-miR-24-3p                                                                                                                                                             |
| HIV | RHOBTB3 | 0,0477266<br>6 | 12 | hsa-miR-98-5p / hsa-miR-432-5p / hsa-miR-379-5p / hsa-miR-146b-5p / hsa-miR-146a-5p / hsa-miR-381-3p / hsa-miR-4435 / hsa-miR-181b-2-3p / hsa-miR-411-5p / hsa-miR-452-5p / hsa-miR-590-3p / hsa-miR-342-5p |
| HIV | DUS1L   | 0,0477266<br>6 | 3  | hsa-miR-7-5p / hsa-miR-24-3p / hsa-miR-193b-3p                                                                                                                                                              |

**Table S3. Pathway enrichment analysis.** Enriched target genes in TS4 were used to identify potentially altered pathways. This table indicates the enriched KEGG pathways for significant miRNA-targets (see ST4) in each analysis (HIV/HCV+ vs HC, HIV/HCV- vs HC, and HIV vs HC).

| Analysis | KEGG Name                                              | Term ID    | FDR   | miRNA-targets                                        |
|----------|--------------------------------------------------------|------------|-------|------------------------------------------------------|
| HIV/HCV+ | Toxoplasmosis                                          | KEGG:05145 | 0     | LAMC2 / PIK3CG / NFKB1 / CASP9 / TLR2 / IRAK1        |
| HIV/HCV+ | Legionellosis                                          | KEGG:05134 | 0,007 | NFKB2 / NFKB1 / CASP9 / TLR2                         |
| HIV/HCV+ | Epstein-Barr virus infection                           | KEGG:05169 | 0,012 | NFKB2 / ICAM1 / NFKB1 / CASP9 / TLR2 / IRAK1         |
| HIV/HCV+ | Antifolate resistance                                  | KEGG:01523 | 0,021 | ABCC1 / NFKB1 / TYMS                                 |
| HIV/HCV+ | PI3K-Akt signaling pathway                             | KEGG:04151 | 0,043 | LAMC2 / PIK3CG / NFKB1 / VEGFA / CASP9 / TLR2 / MCL1 |
| HIV/HCV- | Human immunodeficiency virus 1 infection               | KEGG:05170 | 0,003 | IKBKB / CXCR4 / KRAS / TLR2 / BCL2                   |
| HIV/HCV- | Toxoplasmosis                                          | KEGG:05145 | 0,004 | IKBKB / PIK3CG / TLR2 / BCL2                         |
| HIV/HCV- | Apelin signaling pathway                               | KEGG:04371 | 0,01  | PIK3CG / SERPINE1 / PRKAB1 / KRAS                    |
| HIV/HCV- | Insulin signaling pathway                              | KEGG:04910 | 0,01  | IKBKB / PRKAB1 / KRAS / HK2                          |
| HIV/HCV- | Hepatitis B                                            | KEGG:05161 | 0,019 | IKBKB / KRAS / TLR2 / BCL2                           |
| HIV/HCV- | MicroRNAs in cancer                                    | KEGG:05206 | 0,021 | IKBKB / EZH2 / KRAS / HNRNPK / BCL2                  |
| HIV/HCV- | Pathways in cancer                                     | KEGG:05200 | 0,032 | NFKB2 / IKBKB / CXCR4 / WNT1 / KRAS / BCL2           |
| HIV/HCV- | Chemokine signaling pathway                            | KEGG:04062 | 0,034 | IKBKB / PIK3CG / CXCR4 / KRAS                        |
| HIV/HCV- | PI3K-Akt signaling pathway                             | KEGG:04151 | 0,039 | IKBKB / PIK3CG / KRAS / TLR2 / BCL2                  |
| HIV/HCV- | Epstein-Barr virus infection                           | KEGG:05169 | 0,041 | NFKB2 / IKBKB / TLR2 / BCL2                          |
| HIV/HCV- | PD-L1 expression and PD-1 checkpoint pathway in cancer | KEGG:05235 | 0,048 | IKBKB / KRAS / TLR2                                  |
| HIV      | HIF-1 signaling pathway                                | KEGG:04066 | 0     | SERPINE1 / AKT1 / HK2 / BCL2                         |
| HIV      | Epstein-Barr virus infection                           | KEGG:05169 | 0,004 | NFKB2 / TLR2 / AKT1 / BCL2                           |
| HIV      | Human immunodeficiency virus 1 infection               | KEGG:05170 | 0,005 | CXCR4 / TLR2 / AKT1 / BCL2                           |

|     |                                                      |            |       |                        |
|-----|------------------------------------------------------|------------|-------|------------------------|
| HIV | AGE-RAGE signaling pathway in diabetic complications | KEGG:04933 | 0,013 | SERPINE1 / AKT1 / BCL2 |
| HIV | Chagas disease                                       | KEGG:05142 | 0,013 | SERPINE1 / TLR2 / AKT1 |
| HIV | Toxoplasmosis                                        | KEGG:05145 | 0,017 | TLR2 / AKT1 / BCL2     |
| HIV | Measles                                              | KEGG:05162 | 0,033 | TLR2 / AKT1 / BCL2     |

**Table S4. Differentially expressed miRNAs in HIV/HCV- patients.** Significant differentially expressed (SDE) miRNAs in HIV/HCV- patients compared to healthy controls. Each column represent: the SDE miRNA identifiers (miRBase format), the Log2FC indicating the expression fold change between HIV/HCV- and healthy patients, and the adjusted p-value (FDR, corrected for multiple testing with the Benjamin-Hochberg procedure).

| miRNAs            | FC    | FDR   |
|-------------------|-------|-------|
| hsa-miR-101-5p    | 0,542 | 0     |
| hsa-miR-10395-3p  | 0,432 | 0     |
| hsa-miR-10401-3p  | 0,286 | 0     |
| hsa-miR-11400     | 2,15  | 0     |
| hsa-miR-1180-3p   | 0,657 | 0,004 |
| hsa-miR-1185-1-3p | 1,541 | 0,04  |
| hsa-miR-12135     | 0,475 | 0     |
| hsa-miR-122-5p    | 0,37  | 0     |
| hsa-miR-1246      | 0,111 | 0     |
| hsa-miR-1248      | 0,091 | 0     |
| hsa-miR-1249-3p   | 0,258 | 0     |
| hsa-miR-125a-5p   | 0,451 | 0     |
| hsa-miR-125b-2-3p | 0,64  | 0,004 |
| hsa-miR-125b-5p   | 0,331 | 0     |
| hsa-miR-126-3p    | 1,736 | 0     |
| hsa-miR-126-5p    | 2,119 | 0     |
| hsa-miR-1260a     | 0,461 | 0     |
| hsa-miR-1260b     | 0,47  | 0     |
| hsa-miR-1268a     | 0,565 | 0     |
| hsa-miR-1268b     | 0,616 | 0,001 |
| hsa-miR-127-3p    | 2,135 | 0     |
| hsa-miR-127-5p    | 1,811 | 0,005 |
| hsa-miR-1271-5p   | 0,634 | 0,001 |
| hsa-miR-1285-3p   | 0,564 | 0     |

---

|                   |       |       |
|-------------------|-------|-------|
| hsa-miR-1291      | 0,449 | 0     |
| hsa-miR-1304-3p   | 1,642 | 0     |
| hsa-miR-1306-5p   | 0,404 | 0     |
| hsa-miR-1307-5p   | 0,549 | 0,006 |
| hsa-miR-132-5p    | 0,512 | 0     |
| hsa-miR-134-5p    | 2,537 | 0     |
| hsa-miR-1343-3p   | 0,483 | 0     |
| hsa-miR-136-3p    | 1,739 | 0,008 |
| hsa-miR-139-5p    | 2,434 | 0     |
| hsa-miR-142-3p    | 0,53  | 0     |
| hsa-miR-143-3p    | 2,422 | 0     |
| hsa-miR-146a-5p   | 2,811 | 0     |
| hsa-miR-146b-5p   | 2,314 | 0     |
| hsa-miR-148a-3p   | 1,526 | 0     |
| hsa-miR-148a-5p   | 2,22  | 0     |
| hsa-miR-148b-3p   | 1,792 | 0     |
| hsa-miR-148b-5p   | 1,636 | 0     |
| hsa-miR-150-5p    | 0,42  | 0     |
| hsa-miR-151a-3p   | 1,832 | 0     |
| hsa-miR-1538      | 0,637 | 0,005 |
| hsa-miR-154-5p    | 2,316 | 0     |
| hsa-miR-181b-2-3p | 0,495 | 0     |
| hsa-miR-181c-3p   | 1,58  | 0     |
| hsa-miR-181c-5p   | 1,564 | 0     |
| hsa-miR-182-5p    | 1,653 | 0,002 |
| hsa-miR-183-5p    | 1,892 | 0,025 |
| hsa-miR-185-3p    | 1,665 | 0     |
| hsa-miR-18a-5p    | 1,667 | 0     |
| hsa-miR-191-5p    | 1,535 | 0     |
| hsa-miR-193a-3p   | 0,408 | 0     |
| hsa-miR-193b-3p   | 0,506 | 0     |
| hsa-miR-196a-5p   | 1,835 | 0,004 |
| hsa-miR-197-3p    | 0,497 | 0     |
| hsa-miR-199a-5p   | 1,937 | 0     |
| hsa-miR-200b-3p   | 0,628 | 0     |
| hsa-miR-204-5p    | 1,836 | 0,004 |
| hsa-miR-21-3p     | 1,894 | 0     |
| hsa-miR-210-5p    | 0,32  | 0     |
| hsa-miR-2110      | 0,614 | 0     |
| hsa-miR-224-5p    | 1,65  | 0,01  |
| hsa-miR-23a-5p    | 0,286 | 0     |
| hsa-miR-24-3p     | 1,609 | 0     |
| hsa-miR-2467-5p   | 1,777 | 0     |
| hsa-miR-25-5p     | 0,501 | 0     |
| hsa-miR-26a-2-3p  | 0,64  | 0,007 |
| hsa-miR-27a-5p    | 0,616 | 0,001 |



---

|                  |       |       |
|------------------|-------|-------|
| hsa-miR-296-5p   | 0,344 | 0     |
| hsa-miR-29a-5p   | 0,622 | 0     |
| hsa-miR-29c-3p   | 0,575 | 0     |
| hsa-miR-30a-5p   | 1,905 | 0     |
| hsa-miR-31-5p    | 0,65  | 0,002 |
| hsa-miR-3120-3p  | 1,564 | 0,005 |
| hsa-miR-3142     | 0,362 | 0     |
| hsa-miR-32-3p    | 0,53  | 0     |
| hsa-miR-32-5p    | 0,5   | 0     |
| hsa-miR-324-5p   | 1,639 | 0     |
| hsa-miR-328-3p   | 0,614 | 0     |
| hsa-miR-329-3p   | 1,941 | 0,003 |
| hsa-miR-337-3p   | 1,529 | 0,049 |
| hsa-miR-338-3p   | 0,597 | 0     |
| hsa-miR-33a-5p   | 0,634 | 0,003 |
| hsa-miR-33b-5p   | 0,633 | 0,003 |
| hsa-miR-342-5p   | 0,545 | 0     |
| hsa-miR-3605-3p  | 0,44  | 0     |
| hsa-miR-3609     | 0,253 | 0     |
| hsa-miR-3614-5p  | 1,544 | 0,024 |
| hsa-miR-3615     | 0,649 | 0     |
| hsa-miR-362-3p   | 0,598 | 0,001 |
| hsa-miR-362-5p   | 3,003 | 0     |
| hsa-miR-3651     | 0,483 | 0     |
| hsa-miR-370-3p   | 1,77  | 0,006 |
| hsa-miR-376a-3p  | 2,037 | 0,002 |
| hsa-miR-376c-3p  | 2,564 | 0     |
| hsa-miR-377-5p   | 1,999 | 0     |
| hsa-miR-379-5p   | 2,844 | 0     |
| hsa-miR-381-3p   | 2,15  | 0     |
| hsa-miR-382-5p   | 1,882 | 0,001 |
| hsa-miR-3916     | 0,608 | 0,001 |
| hsa-miR-3960     | 0,185 | 0     |
| hsa-miR-409-3p   | 1,755 | 0,001 |
| hsa-miR-410-3p   | 2,28  | 0     |
| hsa-miR-411-3p   | 1,693 | 0,008 |
| hsa-miR-411-5p   | 2,276 | 0     |
| hsa-miR-423-5p   | 0,475 | 0     |
| hsa-miR-4286     | 0,62  | 0     |
| hsa-miR-431-3p   | 1,559 | 0,024 |
| hsa-miR-431-5p   | 1,6   | 0,011 |
| hsa-miR-432-5p   | 1,999 | 0     |
| hsa-miR-4433b-3p | 0,589 | 0,024 |
| hsa-miR-4433b-5p | 0,643 | 0,03  |
| hsa-miR-4454     | 0,416 | 0     |
| hsa-miR-4508     | 0,223 | 0     |

---

|                  |       |       |
|------------------|-------|-------|
| hsa-miR-450a-5p  | 0,631 | 0,001 |
| hsa-miR-451a     | 2,696 | 0,002 |
| hsa-miR-452-5p   | 2,467 | 0     |
| hsa-miR-4645-3p  | 1,98  | 0     |
| hsa-miR-4685-3p  | 0,543 | 0     |
| hsa-miR-4687-5p  | 0,326 | 0     |
| hsa-miR-4772-3p  | 0,397 | 0     |
| hsa-miR-4772-5p  | 0,422 | 0     |
| hsa-miR-485-3p   | 1,533 | 0,033 |
| hsa-miR-486-5p   | 1,671 | 0     |
| hsa-miR-493-3p   | 1,892 | 0     |
| hsa-miR-493-5p   | 1,878 | 0,001 |
| hsa-miR-495-3p   | 2,031 | 0,002 |
| hsa-miR-502-3p   | 0,576 | 0     |
| hsa-miR-505-5p   | 0,404 | 0     |
| hsa-miR-5100     | 0,498 | 0     |
| hsa-miR-532-3p   | 0,544 | 0     |
| hsa-miR-548ad-5p | 0,634 | 0     |
| hsa-miR-548ae-5p | 0,624 | 0,001 |
| hsa-miR-548ag    | 1,736 | 0,001 |
| hsa-miR-548au-5p | 0,598 | 0     |
| hsa-miR-548ay-5p | 0,608 | 0     |
| hsa-miR-548e-3p  | 0,661 | 0     |
| hsa-miR-5701     | 0,439 | 0     |
| hsa-miR-582-3p   | 1,657 | 0     |
| hsa-miR-584-5p   | 1,683 | 0     |
| hsa-miR-589-5p   | 1,563 | 0     |
| hsa-miR-590-3p   | 0,527 | 0     |
| hsa-miR-624-5p   | 0,664 | 0,007 |
| hsa-miR-627-3p   | 0,656 | 0,007 |
| hsa-miR-629-3p   | 0,591 | 0     |
| hsa-miR-629-5p   | 1,908 | 0     |
| hsa-miR-642a-3p  | 0,534 | 0     |
| hsa-miR-642a-5p  | 0,578 | 0     |
| hsa-miR-6511a-3p | 0,585 | 0     |
| hsa-miR-6511b-3p | 0,45  | 0     |
| hsa-miR-654-3p   | 1,518 | 0,023 |
| hsa-miR-654-5p   | 2,138 | 0     |
| hsa-miR-6724-5p  | 0,622 | 0,001 |
| hsa-miR-6803-3p  | 0,306 | 0     |
| hsa-miR-6837-3p  | 2,009 | 0     |
| hsa-miR-7-5p     | 2,177 | 0     |
| hsa-miR-7704     | 0,405 | 0     |
| hsa-miR-7849-3p  | 1,719 | 0     |
| hsa-miR-7976     | 0,569 | 0     |
| hsa-miR-7977     | 0,366 | 0     |

|                |       |       |
|----------------|-------|-------|
| hsa-miR-877-5p | 0,447 | 0     |
| hsa-miR-889-3p | 1,822 | 0,003 |
| hsa-miR-95-3p  | 0,647 | 0     |
| hsa-miR-98-5p  | 1,588 | 0     |
| hsa-miR-9985   | 0,438 | 0     |
| hsa-miR-99a-5p | 0,46  | 0     |
| hsa-miR-99b-3p | 1,531 | 0     |

**Table S5. Differentially expressed miRNAs in HIV patients.** Significant differentially expressed (SDE) miRNAs in HIV patients compared to healthy controls. Each column represent: the SDE miRNA identifiers (miRBase format), the Log2FC indicating the expression fold change between HIV and healthy patients, and the adjusted p-value (FDR, corrected for multiple testing with the Benjamin–Hochberg procedure).

| miRNAs           | LogFC  | FDR   |
|------------------|--------|-------|
| hsa-miR-101-5p   | -0,837 | 0     |
| hsa-miR-10395-3p | -0,944 | 0     |
| hsa-miR-10399-3p | 0,655  | 0     |
| hsa-miR-10401-3p | -1,85  | 0     |
| hsa-miR-11400    | 1,088  | 0     |
| hsa-miR-12135    | -1,236 | 0     |
| hsa-miR-122-5p   | -1,345 | 0     |
| hsa-miR-1246     | -3,446 | 0     |
| hsa-miR-1248     | -2,812 | 0     |
| hsa-miR-1249-3p  | -1,626 | 0     |
| hsa-miR-125a-5p  | -1,014 | 0     |
| hsa-miR-125b-5p  | -1,161 | 0     |
| hsa-miR-126-3p   | 0,613  | 0,001 |
| hsa-miR-126-5p   | 0,887  | 0     |
| hsa-miR-1260a    | -1,239 | 0     |
| hsa-miR-1260b    | -1,218 | 0     |
| hsa-miR-1268a    | -0,645 | 0,001 |
| hsa-miR-127-3p   | 1,132  | 0     |
| hsa-miR-127-5p   | 0,68   | 0,032 |
| hsa-miR-1277-5p  | -0,713 | 0,002 |
| hsa-miR-1285-3p  | -0,904 | 0     |
| hsa-miR-1291     | -0,969 | 0     |
| hsa-miR-1306-5p  | -1,1   | 0     |
| hsa-miR-1307-5p  | -1,023 | 0     |
| hsa-miR-132-5p   | -0,864 | 0     |
| hsa-miR-134-5p   | 1,144  | 0     |

|                   |        |       |
|-------------------|--------|-------|
| hsa-miR-1343-3p   | -0,738 | 0,001 |
| hsa-miR-138-5p    | -0,643 | 0,003 |
| hsa-miR-139-5p    | 1,109  | 0     |
| hsa-miR-142-3p    | -0,943 | 0     |
| hsa-miR-143-3p    | 1,247  | 0     |
| hsa-miR-144-5p    | 0,786  | 0,043 |
| hsa-miR-146a-5p   | 1,545  | 0     |
| hsa-miR-146b-5p   | 1,187  | 0     |
| hsa-miR-148a-3p   | 0,665  | 0     |
| hsa-miR-148a-5p   | 1,259  | 0     |
| hsa-miR-148b-3p   | 0,94   | 0     |
| hsa-miR-148b-5p   | 0,732  | 0     |
| hsa-miR-150-5p    | -1,164 | 0     |
| hsa-miR-151a-3p   | 0,954  | 0     |
| hsa-miR-152-5p    | 0,897  | 0     |
| hsa-miR-154-5p    | 1,075  | 0     |
| hsa-miR-181b-2-3p | -0,907 | 0     |
| hsa-miR-181c-3p   | 0,692  | 0     |
| hsa-miR-181c-5p   | 0,658  | 0     |
| hsa-miR-182-5p    | 0,886  | 0     |
| hsa-miR-1843      | 0,64   | 0     |
| hsa-miR-185-3p    | 0,824  | 0     |
| hsa-miR-191-5p    | 0,768  | 0     |
| hsa-miR-193a-3p   | -1,167 | 0     |
| hsa-miR-193b-3p   | -0,757 | 0     |
| hsa-miR-196a-5p   | 0,99   | 0,001 |
| hsa-miR-197-3p    | -0,677 | 0     |
| hsa-miR-199a-5p   | 0,808  | 0     |
| hsa-miR-204-5p    | 0,88   | 0,004 |
| hsa-miR-20a-3p    | -0,821 | 0     |
| hsa-miR-21-3p     | 1,089  | 0     |
| hsa-miR-210-5p    | -1,33  | 0     |
| hsa-miR-2110      | -0,629 | 0     |
| hsa-miR-223-5p    | 0,669  | 0     |
| hsa-miR-224-5p    | 0,602  | 0,031 |
| hsa-miR-23a-5p    | -1,651 | 0     |
| hsa-miR-24-3p     | 0,611  | 0     |
| hsa-miR-2467-5p   | 0,82   | 0     |
| hsa-miR-25-5p     | -0,744 | 0     |
| hsa-miR-26a-2-3p  | -0,757 | 0     |
| hsa-miR-27a-5p    | -0,691 | 0     |
| hsa-miR-296-5p    | -1,605 | 0     |
| hsa-miR-29a-5p    | -0,954 | 0     |
| hsa-miR-29c-3p    | -0,821 | 0     |
| hsa-miR-30a-5p    | 1,017  | 0     |
| hsa-miR-31-5p     | -0,655 | 0     |

|                  |        |       |
|------------------|--------|-------|
| hsa-miR-3142     | -1,302 | 0     |
| hsa-miR-3150b-3p | 0,612  | 0     |
| hsa-miR-3176     | 0,662  | 0     |
| hsa-miR-32-3p    | -0,873 | 0     |
| hsa-miR-32-5p    | -1,039 | 0     |
| hsa-miR-324-5p   | 0,786  | 0     |
| hsa-miR-338-3p   | -0,803 | 0     |
| hsa-miR-33a-5p   | -0,939 | 0     |
| hsa-miR-33b-5p   | -0,849 | 0     |
| hsa-miR-342-5p   | -0,75  | 0     |
| hsa-miR-3605-3p  | -0,912 | 0     |
| hsa-miR-3609     | -1,733 | 0     |
| hsa-miR-3613-5p  | -0,59  | 0,005 |
| hsa-miR-3614-5p  | 0,728  | 0,002 |
| hsa-miR-362-3p   | -0,993 | 0     |
| hsa-miR-362-5p   | 1,424  | 0     |
| hsa-miR-3651     | -0,854 | 0,001 |
| hsa-miR-370-3p   | 0,718  | 0,021 |
| hsa-miR-377-5p   | 0,722  | 0,008 |
| hsa-miR-379-5p   | 1,266  | 0     |
| hsa-miR-381-3p   | 0,948  | 0     |
| hsa-miR-382-5p   | 0,787  | 0,002 |
| hsa-miR-3960     | -2,118 | 0     |
| hsa-miR-409-3p   | 0,752  | 0,005 |
| hsa-miR-410-3p   | 1,005  | 0     |
| hsa-miR-411-5p   | 1,045  | 0     |
| hsa-miR-423-5p   | -0,859 | 0     |
| hsa-miR-425-3p   | 0,627  | 0     |
| hsa-miR-432-5p   | 0,904  | 0,002 |
| hsa-miR-4433b-3p | -0,726 | 0,049 |
| hsa-miR-4433b-5p | -0,973 | 0     |
| hsa-miR-4435     | 0,788  | 0,002 |
| hsa-miR-4454     | -1,087 | 0     |
| hsa-miR-4508     | -2,176 | 0     |
| hsa-miR-450a-5p  | -0,614 | 0,002 |
| hsa-miR-4516     | -1,554 | 0     |
| hsa-miR-452-5p   | 0,951  | 0,003 |
| hsa-miR-4645-3p  | 1,136  | 0     |
| hsa-miR-4687-5p  | -1,316 | 0     |
| hsa-miR-4746-5p  | 0,793  | 0     |
| hsa-miR-4772-3p  | -1,333 | 0     |
| hsa-miR-4772-5p  | -1,409 | 0     |
| hsa-miR-486-5p   | 0,919  | 0     |
| hsa-miR-493-3p   | 0,921  | 0,001 |
| hsa-miR-493-5p   | 0,751  | 0,007 |
| hsa-miR-494-3p   | -0,732 | 0,014 |

|                  |        |       |
|------------------|--------|-------|
| hsa-miR-496      | 1,125  | 0     |
| hsa-miR-502-3p   | -0,662 | 0     |
| hsa-miR-505-5p   | -1,106 | 0     |
| hsa-miR-5100     | -0,654 | 0     |
| hsa-miR-532-3p   | -0,642 | 0     |
| hsa-miR-542-3p   | -0,623 | 0,019 |
| hsa-miR-548ae-5p | -0,695 | 0     |
| hsa-miR-548ag    | 0,888  | 0     |
| hsa-miR-548au-5p | -0,713 | 0     |
| hsa-miR-5701     | -0,847 | 0     |
| hsa-miR-582-3p   | 0,895  | 0     |
| hsa-miR-584-5p   | 0,702  | 0,002 |
| hsa-miR-589-5p   | 0,794  | 0     |
| hsa-miR-590-3p   | -1,105 | 0     |
| hsa-miR-624-5p   | -0,722 | 0,001 |
| hsa-miR-629-5p   | 0,98   | 0     |
| hsa-miR-642a-3p  | -0,898 | 0     |
| hsa-miR-642a-5p  | -0,781 | 0     |
| hsa-miR-6511a-3p | -0,622 | 0     |
| hsa-miR-6511b-3p | -1,104 | 0     |
| hsa-miR-654-5p   | 1,261  | 0     |
| hsa-miR-6803-3p  | -1,583 | 0     |
| hsa-miR-6837-3p  | 1,12   | 0     |
| hsa-miR-6852-5p  | 0,65   | 0     |
| hsa-miR-7-5p     | 0,907  | 0     |
| hsa-miR-769-5p   | 0,616  | 0     |
| hsa-miR-7704     | -1,136 | 0     |
| hsa-miR-7849-3p  | 0,9    | 0     |
| hsa-miR-7977     | -1,248 | 0     |
| hsa-miR-877-5p   | -1,01  | 0     |
| hsa-miR-889-3p   | 0,592  | 0,037 |
| hsa-miR-98-5p    | 0,7    | 0     |
| hsa-miR-9985     | -1,144 | 0     |
| hsa-miR-99a-5p   | -0,783 | 0     |
| hsa-miR-99b-3p   | 0,782  | 0     |

---

**Table S6. Top enriched target genes for specific miRNA deregulation signature in HIV/HCV+ patients.** Here we have included the target gene symbol (Gene\_symbol), the adjusted p-value (FDR, corrected p-value for multiple testing performed with the Benjamin-Hochberg procedure), the number of SDE miRNAs that interact with each enriched gene (Num\_interactions), the miRNA identifier in miRBase format and its deregulation sense (miRNA\_expression).

| Gene_symbol | FDR        | Num_interactions | miRNAs_expression | miRNAs                                                                                                            |
|-------------|------------|------------------|-------------------|-------------------------------------------------------------------------------------------------------------------|
| ATG5        | 0,00758142 | 2                | Up                | hsa-miR-9-5p / hsa-miR-34a-5p                                                                                     |
| BIK         | 0,00758142 | 2                | Up                | hsa-miR-9-5p / hsa-miR-34a-5p                                                                                     |
| CASP9       | 0,00758142 | 2                | Up                | hsa-miR-582-5p / hsa-miR-34a-5p                                                                                   |
| DSP         | 0,00758142 | 2                | Up                | hsa-miR-9-5p / hsa-miR-34a-5p                                                                                     |
| ITGB3BP     | 0,00758142 | 2                | Up                | hsa-miR-9-5p / hsa-miR-299-3p                                                                                     |
| MYCN        | 0,00758142 | 3                | Up                | hsa-miR-34a-5p / hsa-miR-582-5p / hsa-miR-299-3p                                                                  |
| PDGFRB      | 0,00810835 | 2                | Up                | hsa-miR-34a-5p / hsa-miR-9-5p                                                                                     |
| HIST1H3F    | 0,01009616 | 2                | Up                | hsa-miR-34a-5p / hsa-miR-9-5p                                                                                     |
| HIST1H4H    | 0,01009616 | 2                | Up                | hsa-miR-9-5p / hsa-miR-34a-5p                                                                                     |
| PRKAA1      | 0,01009616 | 3                | Up                | hsa-miR-582-5p / hsa-miR-299-3p / hsa-miR-9-5p                                                                    |
| ABCA2       | 0,02038456 | 3                | Down              | hsa-miR-485-5p / hsa-miR-320d / hsa-miR-320c                                                                      |
| SPTBN1      | 0,02038456 | 3                | Down              | hsa-miR-589-3p / hsa-miR-423-3p / hsa-miR-331-3p                                                                  |
| ADCY1       | 0,02329885 | 2                | Down              | hsa-miR-423-3p / hsa-miR-331-3p                                                                                   |
| DDX56       | 0,02329885 | 2                | Down              | hsa-miR-423-3p / hsa-miR-331-3p                                                                                   |
| EIF2B5      | 0,02329885 | 3                | Down              | hsa-miR-361-3p / hsa-miR-320d / hsa-miR-320c                                                                      |
| FLII        | 0,02329885 | 2                | Down              | hsa-miR-423-3p / hsa-miR-331-3p                                                                                   |
| POLR2L      | 0,02329885 | 2                | Down              | hsa-miR-423-3p / hsa-miR-331-3p                                                                                   |
| RPS2        | 0,02329885 | 3                | Down              | hsa-miR-361-3p / hsa-miR-423-3p / hsa-miR-331-3p                                                                  |
| SYNGR1      | 0,02329885 | 4                | Down              | hsa-miR-3196 / hsa-miR-486-3p / hsa-miR-1908-5p / hsa-miR-5193                                                    |
| NACC1       | 0,02530053 | 7                | Down              | hsa-miR-1275 / hsa-miR-1908-5p / hsa-miR-331-3p / hsa-miR-3196 / hsa-miR-361-3p / hsa-miR-485-5p / hsa-miR-486-3p |

**Table S7. Top enriched target genes for specific miRNA deregulation signature in HIV/HCV- patients.** Here we have included the target gene symbol (Gene\_symbol), the adjusted p-value (FDR, corrected p-value for multiple testing performed with the Benjamin–Hochberg procedure), the number of SDE miRNAs that interact with each enriched gene (Num\_interactions), the miRNA identifier in miRBase format and its deregulation sense (miRNA\_expression).

| Gene_symbol | FDR        | Num_interactions | miRNAs_expression | miRNAs                                                                                 |
|-------------|------------|------------------|-------------------|----------------------------------------------------------------------------------------|
| PANK3       | 0,01212072 | 5                | Up                | hsa-miR-183-5p / hsa-miR-485-3p / hsa-miR-1185-1-3p / hsa-miR-1304-3p / hsa-miR-337-3p |
| BMI1        | 0,01760736 | 4                | Up                | hsa-miR-183-5p / hsa-miR-411-3p / hsa-miR-3120-3p / hsa-miR-376c-3p                    |
| CD300LB     | 0,01760736 | 2                | Up                | hsa-miR-431-5p / hsa-miR-654-3p                                                        |
| CLDN1       | 0,01760736 | 3                | Up                | hsa-miR-376c-3p / hsa-miR-337-3p / hsa-miR-1304-3p                                     |
| MTRNR2L2    | 0,01760736 | 2                | Up                | hsa-miR-376c-3p / hsa-miR-485-3p                                                       |
| NXPE3       | 0,01760736 | 3                | Up                | hsa-miR-337-3p / hsa-miR-411-3p / hsa-miR-431-5p                                       |
| ERO1B       | 0,01935422 | 2                | Up                | hsa-miR-1185-1-3p / hsa-miR-376c-3p                                                    |
| NBEA        | 0,0257402  | 2                | Up                | hsa-miR-18a-5p / hsa-miR-485-3p                                                        |
| GP2         | 0,0318774  | 3                | Up                | hsa-miR-183-5p / hsa-miR-1304-3p / hsa-miR-431-5p                                      |
| CRIM1       | 0,03275743 | 3                | Up                | hsa-miR-18a-5p / hsa-miR-337-3p / hsa-miR-183-5p                                       |
| SP9         | 0,00937725 | 3                | Down              | hsa-miR-629-3p / hsa-miR-627-3p / hsa-miR-4685-3p                                      |
| ABRAXAS2    | 0,02184939 | 2                | Down              | hsa-miR-627-3p / hsa-miR-629-3p                                                        |
| CYYR1       | 0,02184939 | 2                | Down              | hsa-miR-629-3p / hsa-miR-4286                                                          |
| FAM160A1    | 0,02184939 | 2                | Down              | hsa-miR-1538 / hsa-miR-3916                                                            |
| KHSRP       | 0,02184939 | 5                | Down              | hsa-miR-1180-3p / hsa-miR-548e-3p / hsa-miR-3615 / hsa-miR-4286 / hsa-miR-1538         |
| KIF26B      | 0,02184939 | 2                | Down              | hsa-miR-629-3p / hsa-miR-627-3p                                                        |
| TMEM170B    | 0,02184939 | 3                | Down              | hsa-miR-1271-5p / hsa-miR-4685-3p / hsa-miR-3916                                       |
| TMEM44      | 0,02184939 | 3                | Down              | hsa-miR-629-3p / hsa-miR-627-3p / hsa-miR-4685-3p                                      |
| TMEM87B     | 0,02184939 | 2                | Down              | hsa-miR-629-3p / hsa-miR-4685-3p                                                       |
| TSKU        | 0,02184939 | 4                | Down              | hsa-miR-4286 / hsa-miR-1271-5p / hsa-miR-4685-3p / hsa-miR-3916                        |



**Table S8. Top enriched target genes for specific miRNA deregulation signature in HIVpatients.** Here we have included the target gene symbol (Gene\_symbol), the adjusted p-value (FDR, corrected p-value for multiple testing performed with the Benjamin–Hochberg procedure), the number of SDE miRNAs that interact with each enriched gene (Num\_interactions), the miRNA identifier in miRBase format and its deregulation sense (miRNA\_expression).

| Gene_symbol | FDR        | Num_interactions | miRNAs_expression | ncRNAs                                               |
|-------------|------------|------------------|-------------------|------------------------------------------------------|
| ALG1        | 0,0263088  | 3                | Up                | hsa-miR-4435 / hsa-miR-223-5p / hsa-miR-6852-5p      |
| GLA         | 0,0263088  | 2                | Up                | hsa-miR-769-5p / hsa-miR-4435                        |
| HIST1H4C    | 0,0263088  | 2                | Up                | hsa-miR-425-3p / hsa-miR-3150b-3p                    |
| NCS1        | 0,0263088  | 3                | Up                | hsa-miR-3150b-3p / hsa-miR-4746-5p / hsa-miR-6852-5p |
| NELL2       | 0,0263088  | 2                | Up                | hsa-miR-223-5p / hsa-miR-769-5p                      |
| XRCC2       | 0,0263088  | 3                | Up                | hsa-miR-769-5p / hsa-miR-4435 / hsa-miR-6852-5p      |
| CKAP2L      | 0,02911694 | 2                | Up                | hsa-miR-769-5p / hsa-miR-3150b-3p                    |
| DMXL1       | 0,02911694 | 2                | Up                | hsa-miR-4435 / hsa-miR-223-5p                        |
| EDA2R       | 0,02911694 | 2                | Up                | hsa-miR-3150b-3p / hsa-miR-223-5p                    |
| GGPS1       | 0,02911694 | 2                | Up                | hsa-miR-769-5p / hsa-miR-6852-5p                     |
| CCL16       | 0,01479768 | 2                | Down              | hsa-miR-4516 / hsa-miR-542-3p                        |
| PIM1        | 0,01479768 | 2                | Down              | hsa-miR-4516 / hsa-miR-542-3p                        |
| SUPT16H     | 0,01479768 | 2                | Down              | hsa-miR-542-3p / hsa-miR-494-3p                      |
| TFPI        | 0,01479768 | 2                | Down              | hsa-miR-542-3p / hsa-miR-494-3p                      |
| ZADH2       | 0,01479768 | 2                | Down              | hsa-miR-4516 / hsa-miR-542-3p                        |
| AKT1        | 0,01519299 | 2                | Down              | hsa-miR-542-3p / hsa-miR-494-3p                      |
| BIRC5       | 0,01612581 | 2                | Down              | hsa-miR-542-3p / hsa-miR-494-3p                      |
| CDC14B      | 0,01873976 | 2                | Down              | hsa-miR-4516 / hsa-miR-542-3p                        |
| EN2         | 0,01873976 | 2                | Down              | hsa-miR-4516 / hsa-miR-494-3p                        |
| NF2         | 0,01873976 | 2                | Down              | hsa-miR-4516 / hsa-miR-542-3p                        |
